# Supplementary material
Source: PubMed Central journal article supplement (PMC7758981)
Supplement: ao0c04530_si_001.pdf [file ao0c04530_si_001.pdf]

# Supporting Information

## **Carbon Black and Reduced Graphene Oxide Nanocomposite for binder free supercapacitors with Reduced Graphene Oxide Paper as current collector**

Mario Rapisarda,<sup>†</sup> Achille Damasco,<sup>‡</sup> Giancarlo Abbate<sup>‡</sup> and Michele Meo<sup>†,\*</sup>

<sup>†</sup> Department of Mechanical Engineering, University of Bath, Bath, BA2 7AY, UK

<sup>‡</sup> Dipartimento di Scienze Fisiche "Ettore Pancini", Università degli Studi di Napoli "Federico II", Via Cintia, 80126, Naples, Italy

\* Corresponding Author: [m.meo@bath.ac.uk](mailto:m.meo@bath.ac.uk)

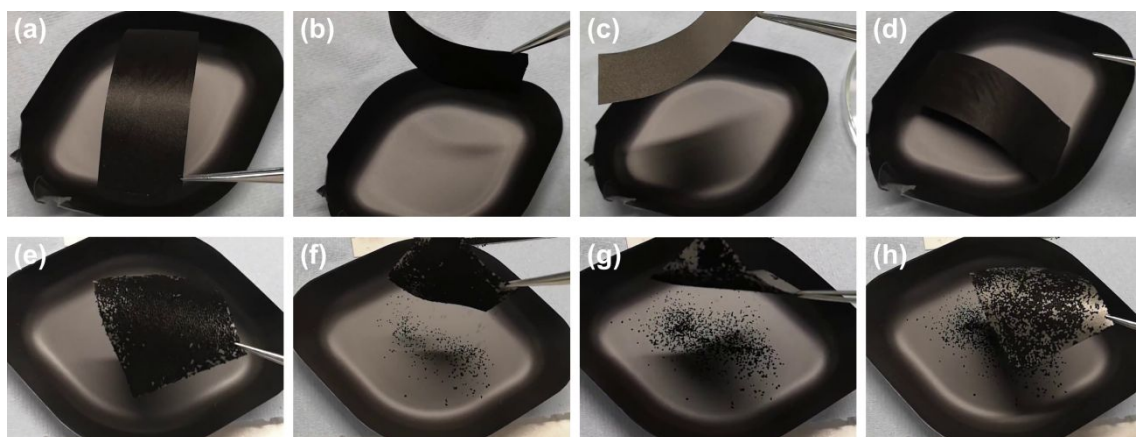

**Figure S1.** Qualitative comparison of the adhesion of the active material on the current collector and of its mechanical integrity between (a-d) CB/GO\_Gr\_TT and (e-h) CB\_Gr\_TT as samples were: (a) and (e), as taken out from the furnace; (b) and (f), tilted on a side; (c) and (g) tilted upside-down; (d) and (h), returned to horizontal position. A considerable amount of active material falling from the current collector is noticeable for the sample CB\_Gr\_TT while no material is detached from the sample CB/GO\_Gr\_TT.

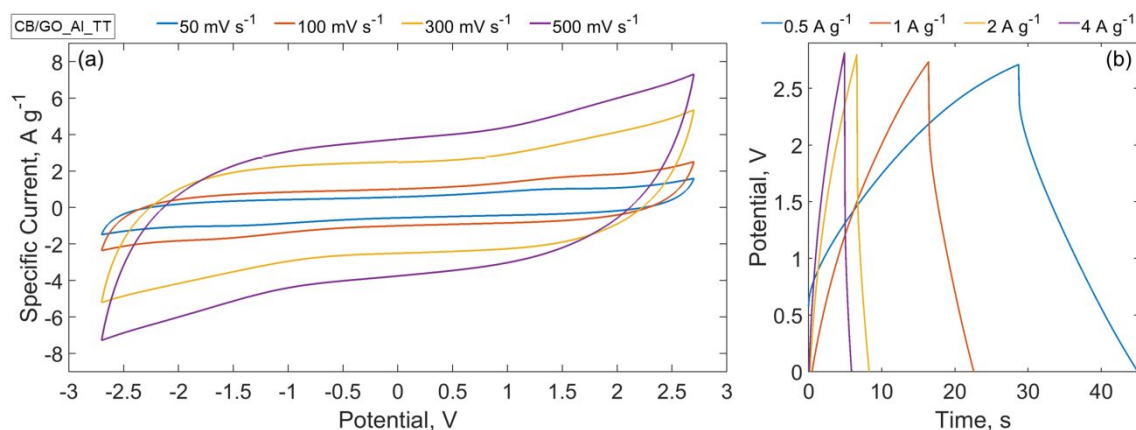

**Figure S2.** (a) CVs and (b) GCs of SCs made with CB/GO\_Al\_TT at different scan rates, from 50 to 500 mV s<sup>-1</sup>, between -2.7 and +2.7 V and different specific currents, from 0.5 to 4 A g<sup>-1</sup>, in a 1.5 M solution of TEMA-TFB in ACN.

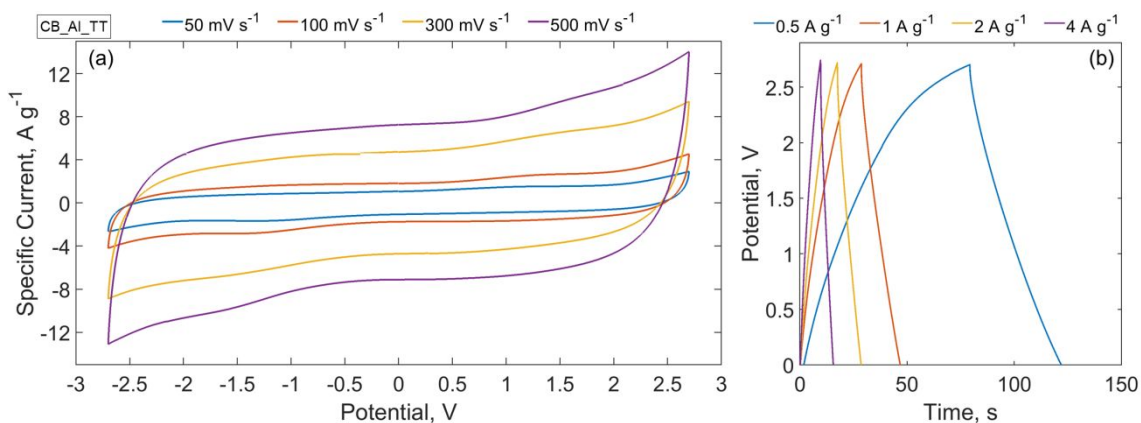

**Figure S3.** (a) CVs and (b) GCs of SCs made with CB\_Al\_TT at different scan rates, from 50 to 500 mV s<sup>-1</sup>, between -2.7 and +2.7 V and different specific currents, from 0.5 to 4 A g<sup>-1</sup>, in a 1.5 M solution of TEMA-TFB in ACN.

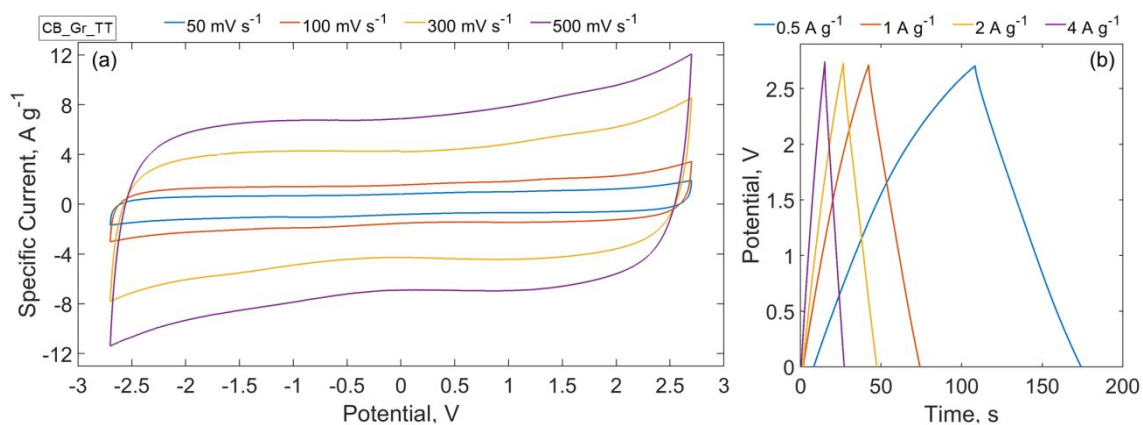

**Figure S4.** (a) CVs and (b) GCs of SCs made with CB\_Gr\_TT at different scan rates, from 50 to 500  $\text{mV s}^{-1}$ , between -2.7 and +2.7 V and different specific currents, from 0.5 to 4  $\text{A g}^{-1}$ , in a 1.5 M solution of TEMA-TFB in ACN.

**Table S1.** Comparison of the four devices of Figure 6 in terms of active mass loading, capacitance and specific capacitance, with the values measured through GCs at specific currents ranging from 0.5  $\text{A g}^{-1}$  to 4  $\text{A g}^{-1}$ .

| Sample      | Active mass<br>[mg] | Capacitance range<br>[mF] | Specific Capacitance range<br>[F g <sup>-1</sup> ] |
|-------------|---------------------|---------------------------|----------------------------------------------------|
| CB_Al_TT    | 3.68                | 31.6-51.6                 | 34.3-56.1                                          |
| CB_Gr_TT    | 3.33                | 42.2-47.3                 | 50.6-56.7                                          |
| CB/GO_Al_TT | 3.16                | 13.1-25.6                 | 16.6-32.4                                          |
| CB/GO_Gr_TT | 2.33                | 13.1-21.7                 | 22.5-37.2                                          |
